# Supplementary material
Source: Springer Nature journal article supplement (https://www.springermedizin.de/resource/supplementary/12889_2008_1606_MOESM3_ESM.pdf/9503536)
Supplement: MOESM3 [file 9503536]

# National definition of priorities for (Public) Health Research

Ministries' organizational arrangements for research

Contracted out research

Less defined

More defined

1. Researcher led  
+ calls

2. Research agenda  
+ calls

ch

es,  
se,  
fr

be

at,fi,hu,  
pt,es,ee

pt, mt

3. Researcher led  
+  
on regularly financed public research  
agencies

4. Research agenda  
+  
on regularly financed public  
research agencies

Own account  
research
